# Supplementary material
Source: Royal Society of Chemistry journal article supplement (doi:10.1039/d6ta01512c)
Supplement: d6ta01512c1.pdf [file d6ta01512c1.pdf]

## Supplementary Information

### Sustainable photocatalytic CO<sub>2</sub> conversion using microalgae as a carbon-negative scavenger

Ho Truong Nam Hai <sup>a,b</sup>, Augusto Ducati Luchessi <sup>c</sup>, Makoto Arita <sup>d</sup>, Qixin Guo <sup>e</sup>, and Kaveh Edalati <sup>a,b,\*</sup>

<sup>a</sup> WPI, International Institute for Carbon Neutral Energy Research (WPI-I2CNER), Kyushu University, Fukuoka 819-0395, Japan.

<sup>b</sup> Department of Automotive Science, Graduate School of Integrated Frontier Sciences, Kyushu University, Fukuoka 819-0395, Japan.

<sup>c</sup> Laboratório de Biotecnologia BraPhyto, Faculdade de Ciências Aplicadas (FCA), Universidade Estadual de Campinas (UNICAMP), 13484-350, Limeira, SP, Brazil

<sup>d</sup> Department of Materials, Kyushu University, Fukuoka 819-0395, Japan

<sup>e</sup> Department of Electrical and Electronic Engineering, Synchrotron Light Application Center, Saga University, Saga 840-8502, Japan

\*Corresponding author (E-mail: kaveh.edalati@kyudai.jp; Phone: +81 92 802 6744)

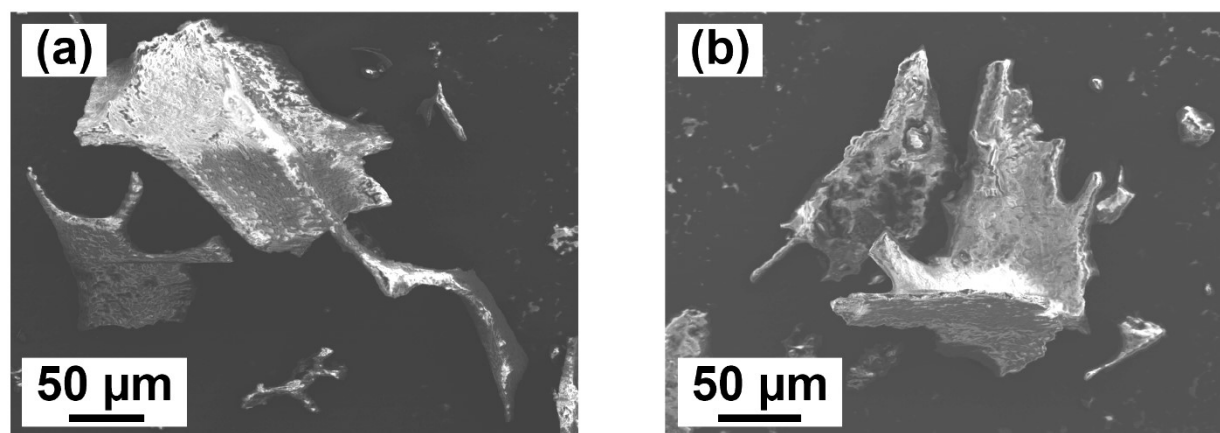

Figure S1. SEM images of microalgae clusters.

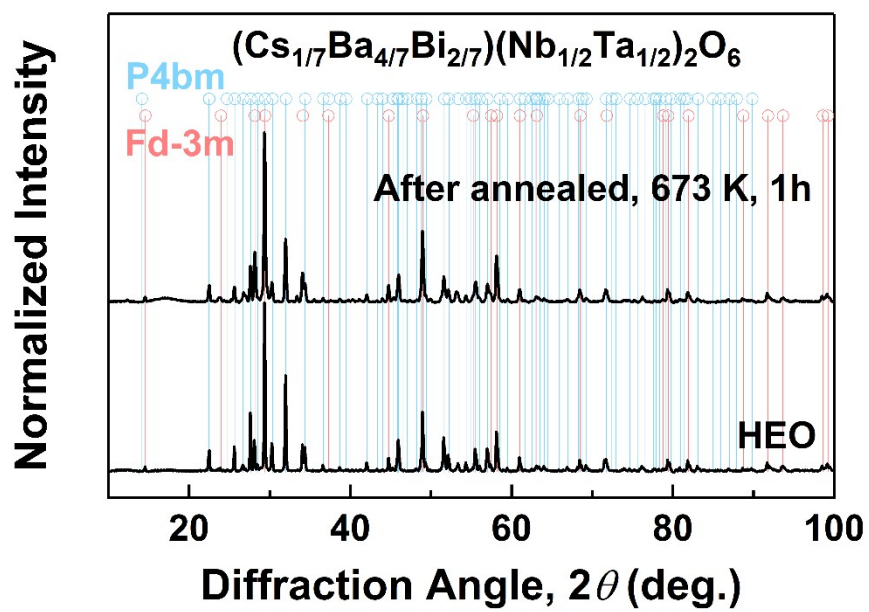

**Figure S2.** Phase transformation of HEO after annealing at 673 K for 1 h.

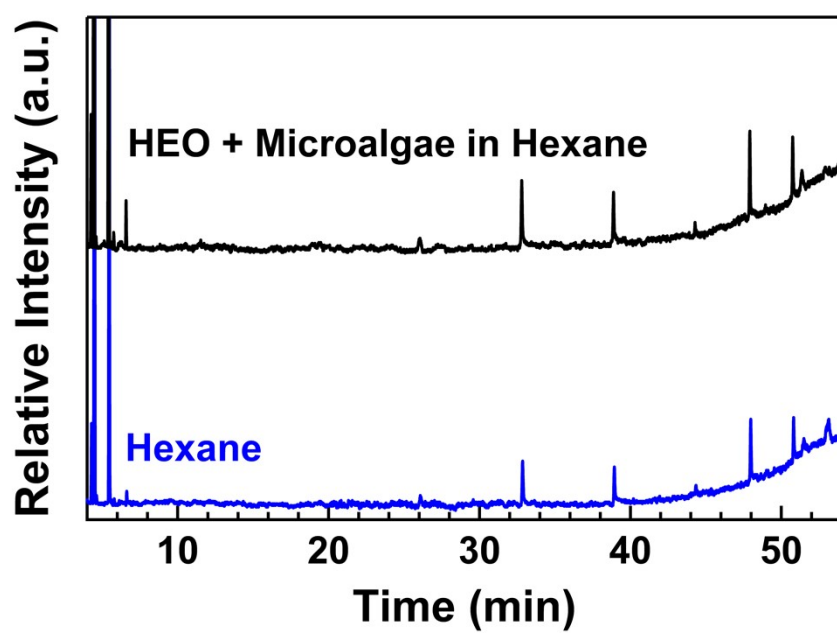

**Figure S3.** GC-MS chromatograms of hexane and extracted liquid phase after 24 h photocatalysis using HEO and microalgae in hexane.
